# Supplementary material for: Low Cerebrospinal Fluid Beta Amyloid1-42 in Patients with Tubercoulous Meningitis
Source: Research Square preprint supplement (doi:10.21203/rs.3.rs-124896/v1), 2020-12-15
Supplement: Supplementary file 1 [file 5afbe23e419bb6f4f92b38fa.docx]

**Low Cerebrospinal Fluid Beta Amyloid1-42 in Patients with Tubercoulous Meningitis**

Stroffolini G1*, Guastamacchia G2, Audagnotto S1, Atzori C2, Trunfio M1, Nigra M3, Di Stefano A1, Di Perri G1, Calcagno A1.

**
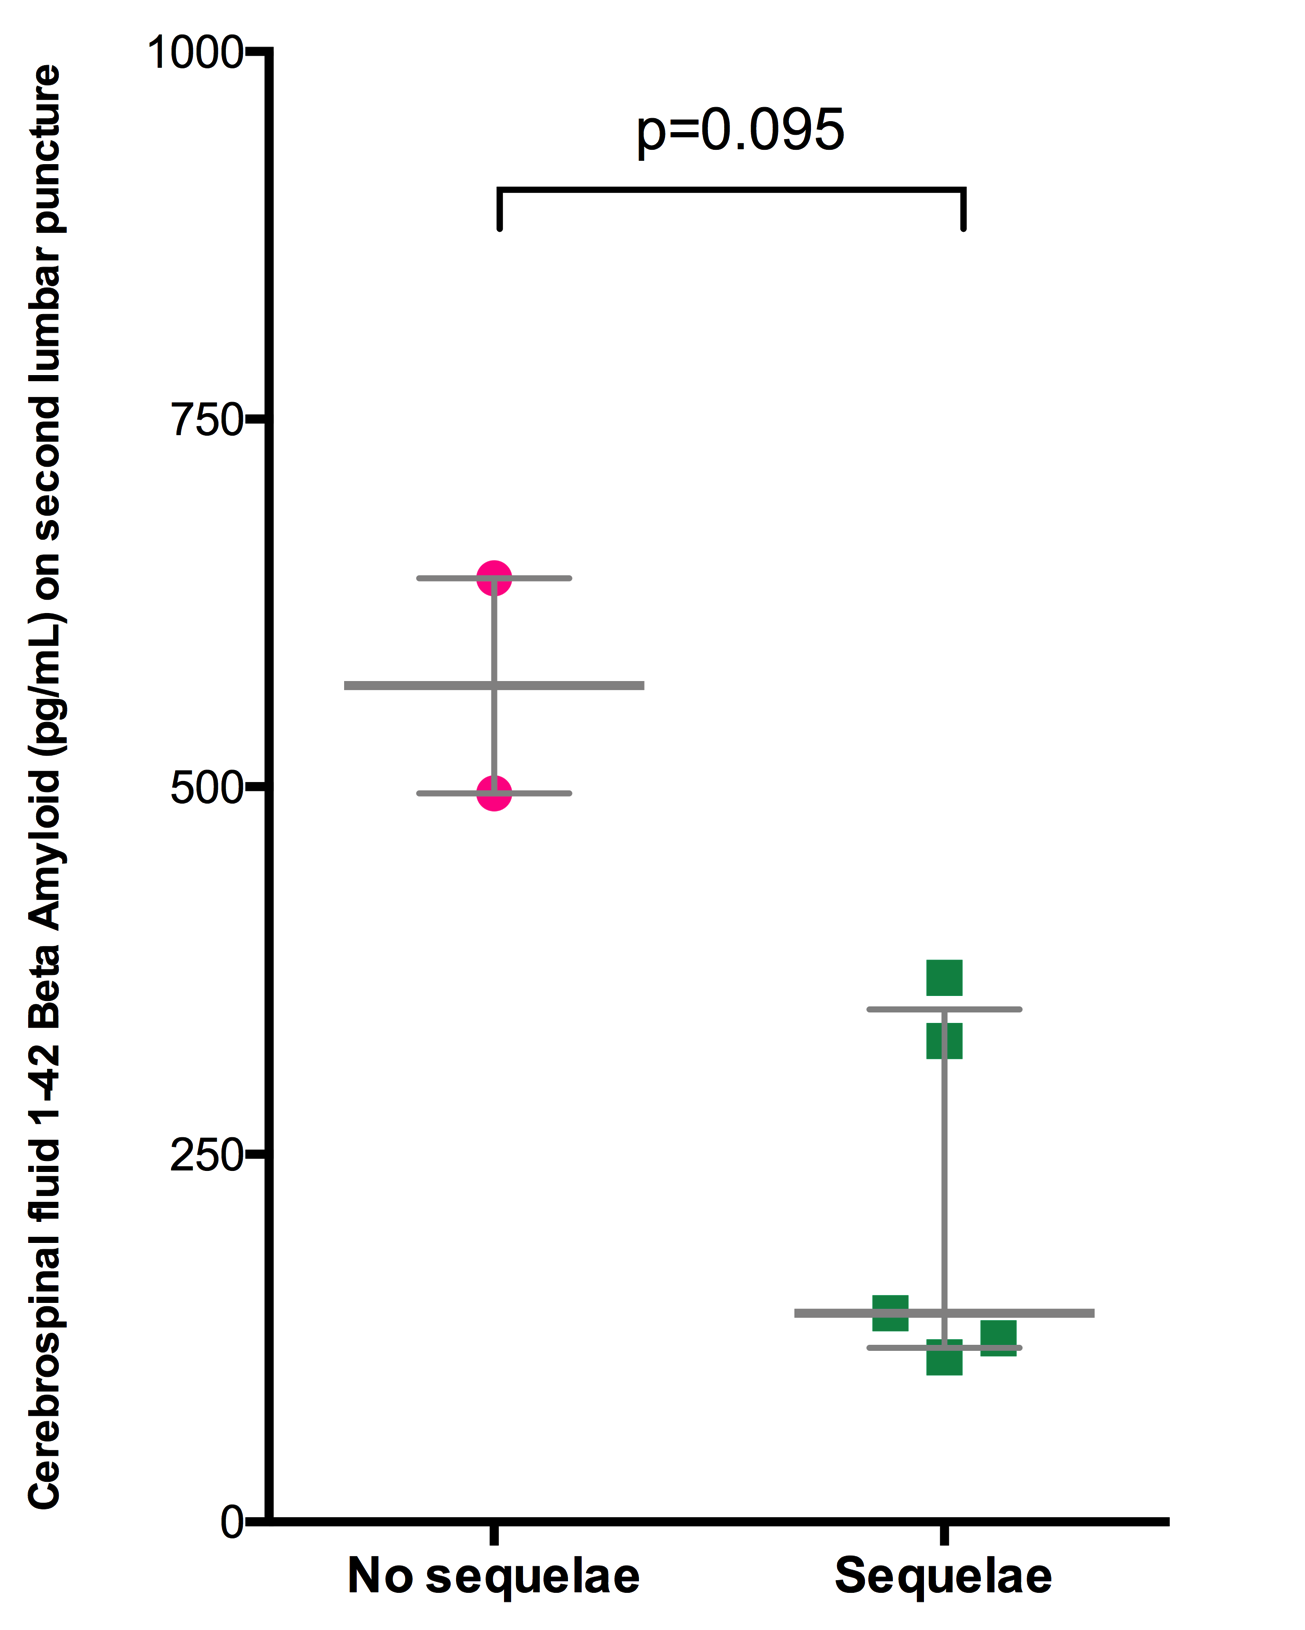
**

**Supplementary figure 1:** Beta Amyloid 1-42 and correlation with outcome (p = 0.07)
